# Supplementary material for: Small molecule dopant-free dual hole transporting material for conventional and inverted perovskite solar cells
Source: Royal Society of Chemistry journal article supplement (doi:10.1039/d3qm00425b), 2023-01-01
Supplement: d3qm00425b1.pdf [file d3qm00425b1.pdf]

## ELECTRONIC SUPPLEMENTARY INFORMATION

### **Small Molecule Dopant-Free Dual Hole Transporting Material for Conventional and Inverted Perovskite Solar Cells**

Miriam Más-Montoya, Paula Gómez, Junke Wang, René A. J. Janssen\* and David Curiel\*

|                                                      |    |
|------------------------------------------------------|----|
| Solar cells fabrication and characterization .....   | S2 |
| Molecular packing .....                              | S3 |
| Space charge limited current and hole mobility ..... | S3 |
| Solar cells J-V characteristics .....                | S4 |
| Thin film UV-vis spectra .....                       | S4 |
| Time Correlated Single Photon Counting .....         | S5 |
| References .....                                     | S5 |

## **Solar cells fabrication and characterization**

Pre-patterned ITO substrates (Naranjo) were cleaned by means of sequential sonication in acetone, sodium dodecyl sulfate solution (99%, Acros), deionised water and isopropanol (15 minutes per step). ITO substrates were dried with a nitrogen flow and treated with UV-ozone for 30 minutes before using. Devices with inverted architecture were fabricated following the protocol previously described.<sup>[1]</sup>

For perovskite solar cells with conventional architecture, an aqueous SnO<sub>2</sub> solution (15 wt%, Alfa Aesar) stirred overnight at room temperature was deposited *via* spin-coating (2800 rpm, 60 seconds) on clean ITO substrates. After cleaning the electrode contacts with water, an annealing step was performed at 150 °C for 30 minutes followed by an UV-ozone treatment for 10 minutes. Next, the substrates were transferred to a nitrogen-filled glovebox to spin coat (2000 rpm, 30 seconds) a solution of [60]PCBM in chlorobenzene (10 mg mL<sup>-1</sup>) which was stirred overnight at 60 °C. The resulting thin film was annealed at 100 °C for 30 minutes. The active layer was prepared using a two-step methodology. First, a solution of PbI<sub>2</sub> (0.93 M) in a DMF:DMSO (5:1) mixture, which was stirred overnight at 70 °C, was casted by static spin-coating (2000 rpm, 40 seconds). Subsequently, a CH<sub>3</sub>NH<sub>3</sub>I solution (0.30 M) in isopropanol, which was stirred overnight at room temperature, was deposited *via* dynamic spin-coating (2000 rpm, 40 seconds). The resulting films were annealed at 130 °C for 10 minutes. Next, **ADI** and **ADAI** hole transporting materials were deposited by thermal evaporation (10<sup>-7</sup>-10<sup>-8</sup> mbar) until a nominal thickness of ~10-20 nm. For the reference Spiro-MeOTAD, <sup>t</sup>BuPy (28.5 µL) and LiTFSI (17.5 µL from a 520 mg mL<sup>-1</sup> solution in acetonitrile) were added to a solution of Spiro-MeOTAD (80 mg mL<sup>-1</sup>) in chlorobenzene and the resulting mixture was stirred overnight at room temperature. Before using it (~1 hour), 20 µL of the complex FK209 (500 mg mL<sup>-1</sup> in acetonitrile) were added and the mixture was stirred at room temperature before casting (2000 rpm, 50 seconds) onto the perovskite active layer. Devices were completed by the sequential thermal evaporation through a mask of MoO<sub>3</sub> (10 nm) and Au (110 nm) under high vacuum conditions (~3 × 10<sup>-7</sup> mbar).

The device area for all perovskite-based devices was estimated by the aperture of a black shadow mask (0.0676 cm<sup>2</sup> and 0.1296 cm<sup>2</sup>). *J-V* characteristics were acquired by using a Keithley 2400 source meter under nitrogen atmosphere. The devices were illuminated using a tungsten-halogen lamp (~100 mW cm<sup>-2</sup>) that included a Schott GG385 UV filter and a Hoya LB120 daylight filter. Fast forward and reverse *J-V* scans were measured between -0.5 V and 1.5 V at a scan rate of 0.25 V s<sup>-1</sup>. The stabilised *J-V* (slow scan) curves were acquired in reverse direction, from *V*<sub>OC</sub> +0.02-0.04 V to -0.02-0.04 V, with steps of 0.02 V. Before each measurement, devices were light soaked at *V*<sub>OC</sub> for 5 minutes. The *J-V* curves were obtained using the final value achieved after registering the current density during 10 seconds at every step. External quantum efficiency spectra were measured under nitrogen atmosphere using a high-power LED with a bias light of 530. The device was irradiated with modulated monochromatic light from a 50 W tungsten-halogen lamp (Osram 64610) and a monochromator (Oriel, Cornerstone 130) using a mechanical chopper. The response was acquired as a voltage from a preamplifier (SR570) based on a lock-in amplifier (SR830). A calibrated silicon cell was employed as reference to determine the corrected values of *J*<sub>SC</sub> and PCE. The

light intensity dependence measurements were carried out by using a Keithley 2400 SMU and high-power LEDs (Thorlabs) that emitted at 405 nm and 730 nm (1-1000 mA).

### **Molecular packing**

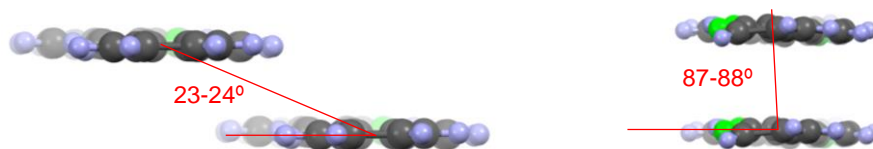

**Figure S1.** Projection across the long axis of  $\pi$ - $\pi$  stacked molecules in ADI (left) and ADAI (right) packing.

### **Space charge limited current and hole mobility**

Single carrier devices with the architecture: ITO / MoO<sub>3</sub> (10 nm) / **HTL** (120 nm) / MoO<sub>3</sub> (10 nm) / Ag (100 nm) were fabricated by thermal evaporation under high vacuum.  $J$ - $V$  curves were measured using a Keithley 2636A SMU. These curves were fitted to estimate the space charge limited hole mobility according to the Murgatroyd equation:<sup>[2]</sup>  $J = (9/8)\epsilon_0\epsilon_r\mu_0(V^2/L^3)\exp[0.89\beta(V/L)^{1/2}]$ , where  $J$  is the current density,  $\epsilon_0$  the vacuum permittivity ( $8.85 \times 10^{-14}$  F cm<sup>-1</sup>),  $\epsilon_r$  the relative permittivity of the organic layer (approximated to a value of 3),  $\mu_0$  the zero-field mobility,  $L$  the thickness of the organic layer, and  $\beta$  the field-activation factor. The hole mobility was determined using the Poole-Frenkel relationship,  $\mu = \mu_0 \exp(\beta E^{1/2})$ , at an electric field of  $10^5$  V cm<sup>-1</sup>, using the values of  $\mu_0$  and  $\beta$  obtained by the non-linear fitting of the  $J$ - $V$  curves.

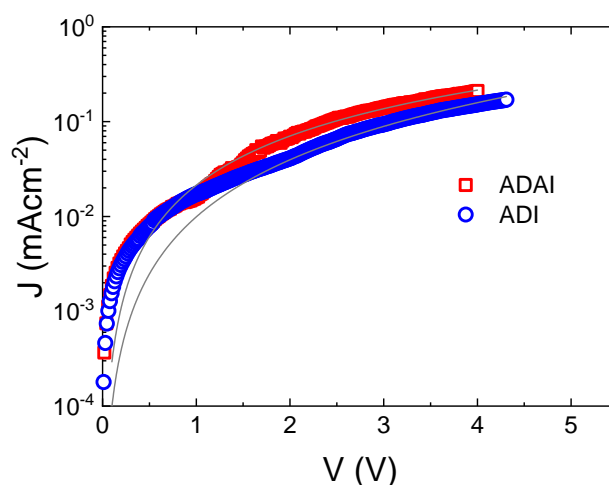

**Figure S2.**  $J$ - $V$  characteristics of the hole-only devices. The solid line represents the fit of the data to the Murgatroyd relation for space charge limited current with a field-dependent mobility. Below 1 V, the current density is dominated by an Ohmic leakage current, explaining the discrepancy with fit in that region.

### Solar cells J-V characteristics

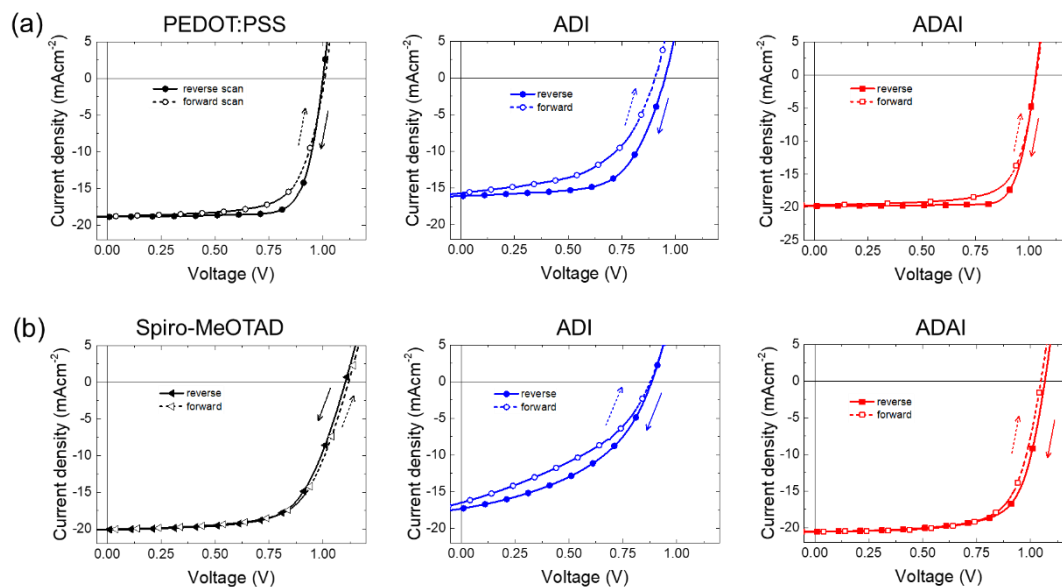

**Figure S3.** Forward and reverse and J-V scans of the optimized devices with (a) p-i-n and (b) n-i-p architectures.

### Thin film UV-vis spectra

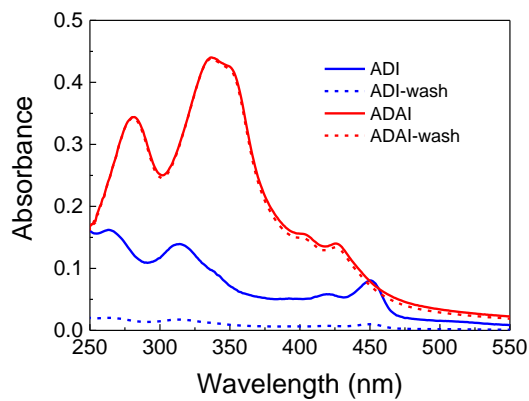

**Figure S4.** UV-vis absorption spectra of **ADI** and **ADAI** thin films before and after DMF treatment.

## Time Correlated Single Photon Counting

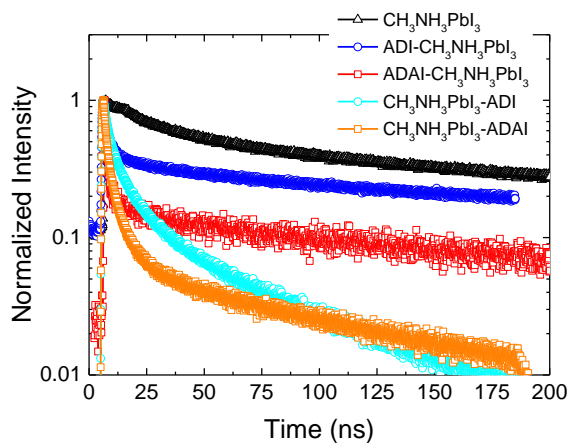

**Figure S5.** Time-resolved photoluminescence decay profiles registered at PL maximum.

**Table S1.** Time Correlated Single Photon Counting fitting parameters.

|                     | $A_1$ | $\tau_1$ (ns) | $A_2$ | $\tau_2$ (ns) | $\tau_{avg.}$ (ns) |
|---------------------|-------|---------------|-------|---------------|--------------------|
| glass / MAPI        | 0.58  | 21.8          | 0.42  | 162           | 140                |
| glass / ADI / MAPI  | 9.2   | 2.24          | 0.22  | 79            | 37                 |
| glass / ADAI / MAPI | 12.7  | 2.20          | 0.36  | 51            | 21                 |
| glass / MAPI / ADI  | 4.3   | 3.20          | 0.36  | 26            | 12                 |
| glass / MAPI / ADAI | 20.8  | 1.91          | 0.18  | 21            | 3.5                |

$$^a \tau_{avg.} = \sum A_i \tau_i^2 / \sum A_i \tau_i$$

## References

- [1] M. Más-Montoya, P. Gómez, D. Curiel, I. da Silva, J. Wang, R. A. J. Janssen, *Chem. Eur. J.* **2020**, 26, 10276-10282.
- [2] P. N. Murgatroyd, *J. Phys. D: Appl. Phys.* **1970**, 3, 151-156.
